# Supplementary material for: CO2 Absorption Mechanism by the Nonaqueous Solvent Consisting of Hindered Amine 2-[(1,1-dimethylethyl)amino]ethanol and Ethylene Glycol
Source: MDPI journal article supplement (doi:10.3390/molecules25235743), 2020-12-05
Supplement: s1 [file s1]

Supplementary

# **CO<sub>2</sub> Absorption Mechanism by the Nonaqueous Solvent Consisting of Hindered Amine 2-[(1,1-dimethylethyl)amino]ethanol and Ethylene Glycol**

**Ran Li <sup>1</sup>, Congyi Wu <sup>2</sup> and Dezhong Yang <sup>2,\*</sup>**

<sup>1</sup> School of Earth Sciences and Resources, China University of Geosciences, Beijing 100083, China; ran594244379@163.com

<sup>2</sup> School of Science, China University of Geosciences, Beijing, 100083, China; wucongyi@cugb.edu.cn

\* Correspondence: yangdz@cugb.edu.cn

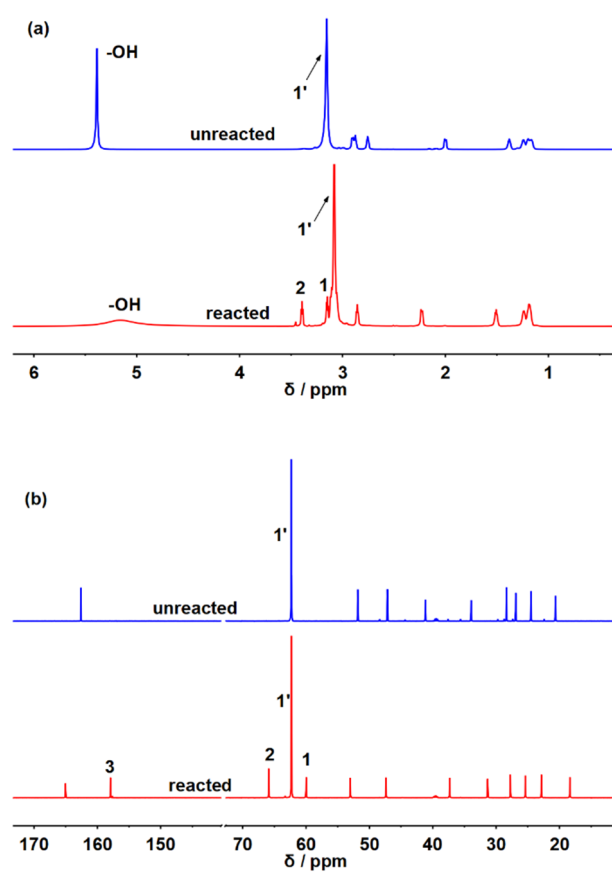

**Figure S1.** The  $^1\text{H}$  (a) and  $^{13}\text{C}$  NMR (b) spectra of DBU-EG before and after  $\text{CO}_2$  absorption.

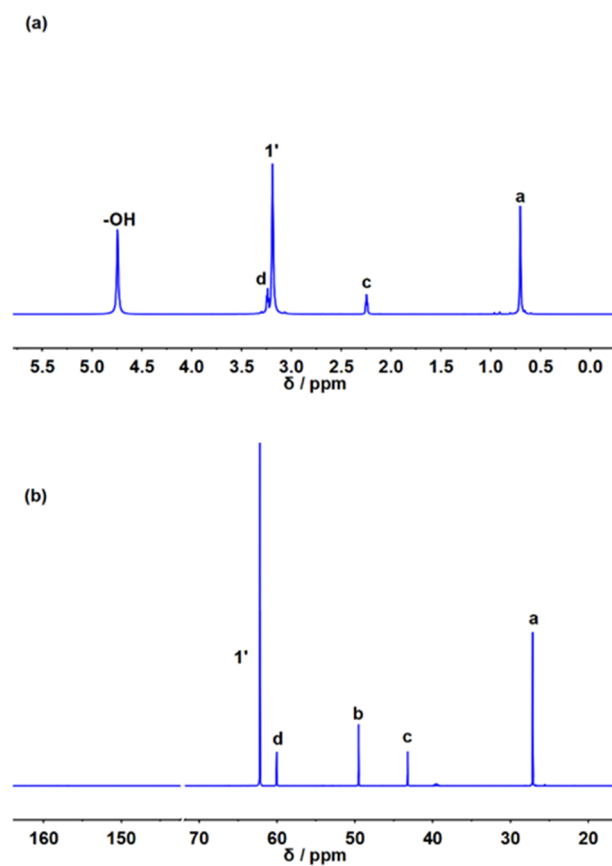

**Figure S2.** The  $^1\text{H}$  (a) and  $^{13}\text{C}$  NMR (b) spectra of TBAE-EG after  $\text{CO}_2$  desorption.

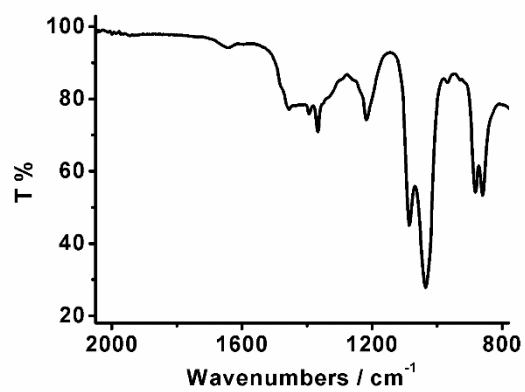

**Figure S3.** The FTIR spectra of TBAE-EG after  $\text{CO}_2$  desorption.
